# Supplementary material for: ATP allosterically stabilizes integrin-linked kinase for efficient force generation
Source: PubMed Central journal article supplement — Proc Natl Acad Sci U S A. 2022 Mar 8;119(11):e2106098119. doi: 10.1073/pnas.2106098119 (PMC8933812; doi:10.1073/pnas.2106098119), 2022-03-08
Supplement: pnas.2106098119.sapp.pdf [file pnas.2106098119.sapp.pdf]

1

## 2 **Supplementary Information for**

### 3 **ATP allosterically stabilizes Integrin-linked kinase for efficient force generation**

4 **Isabel M. Martin, Michele M. Nava, Sara A. Wickström and Frauke Gräter**

5 **Frauke Gräter and Sara Wickström.**

6 **E-mail: frauke.graeter@h-its.org; sara.wickstrom@helsinki.fi**

#### 7 **This PDF file includes:**

- 8 Supplementary text
- 9 Figs. S1 to S8 (not allowed for Brief Reports)
- 10 Table S1 (not allowed for Brief Reports)
- 11 Legends for Movies S1 to S13
- 12 SI References

#### 13 **Other supplementary materials for this manuscript include the following:**

- 14 Movies S1 to S13

## 15 Supporting Information Text

### 16 Detailed methods

17 **Equilibrium molecular dynamics simulations.** The crystal structures of the human ILK(WT) kinase domain in complex with the  
18 CH2-domain of  $\alpha$ -parvin either with ATP (Protein Data Bank (PDB)-code 3KMW) or without ATP (3KMU, (1)) were used. To achieve  
19 starting structures without parvin, those coordinates were deleted. The PDB-code 6MIB (2) was used for the simulations with the  
20 ILK(L207W) mutation. Point mutations for ILK(R225/R349A) were generated using pymol. All MD simulations were carried out using  
21 GROMACS 2018.1 (3). The Amber99sb\*-ILDNP force-field (4, 5), TIP3-water model (6) and ATP-parameters (7) were used. The starting  
22 configurations were solvated in the center of a dodecahedron box with (at least) 3 nm between each periodic image. Sodium and chloride  
23 ions corresponding to a physiological concentration of 100 mM were added resulting in a system with overall zero charge. An energy  
24 minimization was performed with the steepest descent method, followed by 500 ps in the NVT and 500 ps in the NPT ensemble with  
25 harmonic constraints on all protein atoms with a force constant of  $1000 \text{ kJ mol}^{-1} \text{ nm}^{-1}$  to equilibrate water and ions. The production runs  
26 were carried out in the NPT ensemble without constraints on heavy atoms. All bonds between hydrogens and protein heavy atoms were  
27 constrained using the LINCS algorithm (8). Therefore, a timestep of 2 fs could be used. The temperature was kept constant at  $T = 300 \text{ K}$   
28 using the velocity rescaling thermostat (9) with a coupling time of 0.1 ps. The two temperature coupling groups were (1) all protein and  
29 ATP atoms and (2) all water and ions. The pressure was kept constant at 1 bar using the isotropic Parrinello-Rhman barostat (10) with a  
30 coupling time of 2 ps and a compressibility of  $4.5 \times 10^{-5} \text{ bar}^{-1}$ . The neighbors list was updated every 10 fs with the Verlet scheme. A  
31 cutoff of 1.0 nm was used for all non-bonded interactions and long-range electrostatic interactions were treated using the Particle mesh  
32 Ewald method (PME, (11)) with a grid spacing of 0.16 nm with cubic interpolation. If not stated otherwise the systems were simulated for  
33 500 ns. For the analysis the first 20 ns were neglected as equilibration period, as inspected from the protein backbone root-mean square  
34 deviation (RMSD). 20 individual production runs were carried out, with random velocities and their own equilibration phases, totaling to a  
35 total simulation time used for the analysis of 9.6  $\mu\text{s}$  per condition.

36 **Guided molecular docking.** To determine a patch of residues on ILK that is most likely in contact with kindlin-2 we employed a guided  
37 molecular docking approach. One available crystal structure of the nearly complete mouse kindlin-2 is missing only two loops within the  
38 F1 domain and the PH-domain (PDB: 5XPY, (12)). Unfortunately, the ILK-binding helix (PDB: 2MSU, (13)) is located at the edge of the  
39 PH domain and is only partially included in the nearly full structure. Therefore, we combined all available partial structures of kindlin-2  
40 (ILK-binding helix: 2MSU; free PH-domain: 4F7H and 2LKO (14, 15); N-terminus: 2LGX (16)) and aligned them with the main body  
41 of kindlin-2 (PDB: 5XPY) using UCSF-Chimera (17). This structural alignment was performed according to an underlying sequence  
42 alignment with the human kindlin-2 generated with T-coffee (18). Since the structures of the free PH-domains do not overlap in sequence  
43 with the main kindlin body, they were placed near the artificially inserted loop in the F2 domain of the main body structure in such a way  
44 that the residues that follow in the sequence have a minimal distance to each other. In doing so six rotations of the PH-domains were  
45 generated. For the missing loop within the F1 domain there is no crystal structure, but it is far apart from the ILK binding site and thus  
46 we regard it as neglectable for the ILK binding. The final full structures were generated by a homology modeling using MODELLER  
47 (19) based on the positions of the placed fragments. For each of the six conformations, four models were generated. Eleven models in  
48 which the F1-loop was not threaded through the protein were selected for further analysis. Those were subjected to a short 20 ns to  
49 30 ns MD simulation (see above for simulation parameters). A cluster analysis over the whole trajectory determined the most populated  
50 conformations, which were selected for the guided molecular docking with Haddock2.2 (20). For ILK, the most populated structure from  
51 the 100 ns MD simulation of PDB-code 3KMW was used. The experimentally validated residues of ILK that are in direct contact with  
52 kindlin-2 (K423, I427, (21)) were chosen as the actively participating residues. The residues of kindlin-2 (L353, E354, L357, E358) that  
53 were shown to interact with ILK (13) were set as active residues as well. Passive residues were defined automatically around the active  
54 residues. Seven docking protocols were successful and used for further analysis.

55 **Determination of pulling sites.** The ILK:kindlin-2 docking poses were used to determine the most physiological cluster of residues for  
56 mechanical perturbation. From the 361 highest scoring docking poses we determined the residues in ILK that are in contact with kindlin-2  
57 within a cutoff of 0.35 nm. The residues that occur in most of the docking poses are: P419, H420, K423, I427, K435, M441, K448. These  
58 were then taken as the patch of residues for force-probe MD. For parvin, we adopted a similar approach. From the structures of the  
59 parvin-CH2 domain in complex with the paxillin LD1 domain (PDB-codes: 4EDN (22) and 2K2R (23)) the residues on parvin that are  
60 interacting with paxillin within the same threshold of 0.35 nm were determined. This resulted in the residues A249, T252, V264, T267,  
61 R369 as the patch of residues on parvin for pulling.

62 **Force-probe molecular dynamics simulations.** We used force-probe MD to simulate the effects of mechanical perturbation on the  
63 system. The end-conformations of the equilibrium simulations were placed in the center of a rectangular box of  $30 \text{ \AA} \times 15 \text{ \AA} \times 15 \text{ \AA}$  and  
64 rotated so that the axis between the putative pulling points is in line with the x-axis of the box. The system was energy minimized, followed  
65 by short simulations in the NVT and NPT ensemble as described above. For the production run the respective residue patches were  
66 subjected to harmonic spring potentials with a force constant of  $50 \text{ kJ mol}^{-1} \text{ nm}^{-1}$  moving in opposite directions with a constant velocity  
67 ( $v = 1 \text{ m s}^{-1}$  to  $0.01 \text{ m s}^{-1}$ ). 10 simulations were performed per velocity and condition. The simulations were stopped upon dissociation of  
68 ILK:parvin.

69 **MD analysis and visualization.** The computational analysis was performed with GROMACS tools and post-processed with Python 3. If  
70 not stated otherwise, the first 20 ns of each equilibrium simulation were excluded from the analysis. The RMSD of the backbone atoms  
71 was calculated in relation to the first frame of the production run. Further, the two starting structures of the holo and apo complex were

found to be remarkably similar to each other (1). Thus, the differences in RMSD do not reflect differences in the overall structure of the ILK pseudokinase domain but rather show that ATP influences the dynamical behavior. The saltbridge occupancy/residue contact probabilities were calculated by determining the number of frames of the whole trajectory with a residue-residue distance below a threshold of 0.35 nm. To determine the interface area between ILK and parvin, we calculated the solvent accessible surface area (SASA, (24)) for both proteins alone and for the complex. The interface area can be calculated according to equation 1:

$$\frac{1}{2}(SASA_{ILK} + SASA_{parvin} - SASA_{complex}) \quad [1]$$

We define a complex dissociation event if the interface area is below 0.6 nm. For visualization of protein structures we used visual molecular dynamics (VMD; (25)). For the generation of the final figures we used Inkscape.

**Principle component analysis.** We performed principle component analysis (PCA, reviewed in (26)) with GROMACS utilities covar and anaeg to identify the major correlated structural motions. The first 20 ns of each equilibrium MD trajectory were neglected and the PCA was conducted on the C- $\alpha$  atoms of the cumulative trajectories of the ILK holo und apo state or ILK(L207W). Rotational and translational motions were removed by superimposing the structures along the trajectory onto the invariant core. A covariance matrix from the C- $\alpha$  positions was generated. The eigenvectors that describe the direction of motion, are generated by diagonalization of the covariance matrix. The corresponding eigenvalue describes the magnitude (energetic contribution) of that component to the motion. Projection of the trajectory on the eigenvectors shows the motions of the protein along this mode of motion. All trajectories were projected onto the eigenvectors generated by the apo state. The top two eigenvectors were considered to construct the two-dimensional histogram.

**Force distribution analysis.** We used force distribution analysis (FDA (27)) implemented into GROMACS to calculate the changes in internal forces between the ILK holo and apo states. In FDA the pairwise forces between atom pair  $i$  and  $j$  are calculated considering all interaction types between protein atoms. These time-averaged pairwise forces can be non-zero even in equilibrium simulations. For a residue based analysis the inter-residue forces were calculated according to equation 2:

$$F_{u,v} = \sum_{i \in u, j \in v} F_{ij} \quad [2]$$

where  $i$  is an atom of residue  $u$  and  $j$  is an atom of residue  $v$ , with  $u$  and  $v$  being different and where  $F_{ij}$  is the pairwise force between atoms  $i$  and  $j$ . The FDA was performed on each individual trajectory per condition and the resulting average forces of the apo state were subtracted from those of the holo state. The networks shown are connected edges for at least 3 residues with force differences above a given threshold. Each interaction in the graphs shows a statistically significant change in internal forces (Mann-Whitney test,  $p < 0.05$ ).

The punctual stress is the sum of the absolute values of scalar pairwise forces acting on each atom  $i$ :

$$S_i = \sum_j |F_{ji}| \quad [3]$$

**Plasmid constructs.** Full length mouse ILK cDNA was cloned into the EcoRI site of pEGFP-N1 plasmid (Clontech). The R255A, R349A, and L207W mutations were generated by performing site-directed mutagenesis PCR using Quik Change II Mutagenesis Kit (Agilent) with the following primers:

R255A forward: 5'-CCTTGACTCCAGTCTGCAACCTTCAGCACCTTCA-3' and  
 R255A reverse 5'-TGAAGGTGCTGAAGTTGCAGACTGGAGTACAAGG-3';  
 R349A forward 5'-AGGCGCATACATGGCCCCAGGGCACTGG-3' and  
 R349A reverse 5'-CCAGTGCCCTGGGGCCATGTATGCGCCT-3';  
 L207W forward: 5'-CCTGCCAGCGGCCTTTCCACCACTCTCCAGAATGATTCTCA-3' and  
 L207W reverse 5'-TGAGAATCATTCTGGAGAGTGGTGGAAAGGCCGCTGGCAGG-3'.

**Cell culture and transfection.** Immortalized ILK<sup>-/-</sup> mouse fibroblasts were obtained as described (28) and cultured in Dulbecco's MEM, 10 % FBS (Gibco) in 5 % CO<sub>2</sub> at 37 °C. Transient transfections were performed using Lipofectamine 3000 reagent (Invitrogen) according to the manufacturer's instructions. After 24 h of transfection cells were subjected to specific experimental analyses.

**Immunoprecipitation.** Transfected cells grown on polystyrene dishes were rinsed in phosphate-buffered saline (PBS), suspended in lysis buffer (50 mM Tris-HCl buffer (pH 8.0) containing 150 mM NaCl, 1 % Triton-X 100, 0.05 % sodium deoxycholate, 10 mM EDTA, protease, and phosphatase inhibitors (Roche)), and cleared by centrifugation. GFP immunoprecipitation was performed using Miltenyi Biotec MultiMACS GFP Isolation Kit (Mylteni Biotec 130-091-125) according to the manufacturer's protocol. The immunocomplexes were eluted in Laemmli sample buffer by boiling and analyzed by western blotting.

**Western Blotting.** Lysates were reduced in Laemmli sample buffer at 95 °C, separated by PAGE in the presence of SDS, transferred onto PVDF membranes and subjected to western blot analyses using the standard protocols. The following antibodies were used: anti- $\alpha$  parvin (Cell Signalling; 4026 ; 1:2500), anti-GFP (Invitrogen; A1112; 1:2500) and anti-rabbit HRP (Bio-Rad Laboratories). Western blots were quantified using densitometry (ImageJ software) (29) from four independent experiments.

120 **Generation of soft and stiff substrates.** 8 kPa and 40 kPa polyacrylamide (PAA) gels (7.5 % acrylamide/0.25 % bis-acrylamide) were  
121 cast on 20 x 20 glass coverslips after which fibronectin was chemically crosslinked on gels using Sulfo-SANPAH (Pierce). Gel stiffness  
122 was measured as described (30). For traction force microscope gels were manufactured as above by adding 0.2  $\mu\text{m}$  fluorescent  
123 beads (1:125; Polysciences). Gels were washed in 70 % Ethanol and rinsed extensively in PBS after which transfected cells were plated,  
124 allowed to adhere and live imaged for focal adhesion dynamic analysis or used for traction force microscopy experiments.

125 **Focal adhesion dynamics.** Transfected cells on 8 kPa and 40 kPa Fibronectin-coated PAA gels were imaged using a Zeiss Axiovert  
126 inverted microscope coupled to a CSUX1 spinning-disc device (Yokogawa) equipped with a 488 nm laser, sCMOS camera (Hamamatsu)  
127 and an environment chamber. Imaging was performed with a 100 $\times$  oil immersion objective (Zeiss) at 37 °C, 5 % CO<sub>2</sub>. Images were  
128 acquired at a frame rate of 1 frame/30 sec for 30 min. To quantify adhesion dynamics, time-lapse movies were preprocessed using  
129 Fiji (29) by subtracting the background, denoising and linear contrast enhancement. Image sequences were then submitted to Focal  
130 Adhesion Server Analysis FAAS (31). The following settings were used: no median filter was applied, detection threshold was set  
131 to 2.5. The minimal size for focal adhesion detection, namely the focal adhesion threshold area was set to 20 pixels after a careful  
132 visual inspection of the focal adhesion segmentation and tracking. The number of focal adhesions per cell was then normalized to the  
133 corresponding cell area. To this purpose, cell edges were manually traced. Assembly and disassembly events per adhesion per cell were  
134 collected based on R<sup>2</sup> values greater or equal 0.8 (31).

135 **Traction Force Microscopy.** Traction force microscopy was performed essentially as described (32). Transfected cells were cultured on  
136 8 kPa PAA. Imaging was performed using a spinning disc microscope described above with a 40 $\times$  glycerol objective at 37 °C with 5 % CO<sub>2</sub>.  
137 Cells were imaged prior and after the addition of 10X trypsin to detach cells and obtain bead displacement images. Calculation of traction  
138 forces was performed using particle imaging velocimetry (PIV) and Fourier transform traction cytometry (FTTC) with regularization (10<sup>-9</sup>)  
139 using Fiji (29) as described previously (33). Traction forces were reconstructed at a grid spacing of 5  $\mu\text{m}$  and total cellular force was  
140 calculated from the average of traction magnitudes. At least 30 cells/condition were analysed.

141 **Migration assay and cell tracking.** Transfected cells (5000 cells/well) were plated on 4-well chamber slides (Thermo Scientific™  
142 Nunc™ Lab-Tek™ II Chamber Slide™) and imaged by using differential interference contrast (DIC) optics with a Zeiss Axiovert inverted  
143 microscope coupled to a CSUX1 spinning-disc device (Yokogawa) equipped with a 488 nm laser, sCMOS camera (Hamamatsu) and an  
144 environment chamber. Imaging was performed with a 25 $\times$  oil immersion objective (Zeiss) at 37 °C, 5 % CO<sub>2</sub>. Images were acquired  
145 at a frame rate of 1 frame/30 min for 12 h. To quantify individual cell trajectories, cells were manually tracked by using the Fiji plugin  
146 Trackmate (34). The mean distance and cell velocity were calculated by averaging the displacement (in  $\mu$ ) and the velocity ( $\mu\text{m}/\text{min}$ )  
147 between consecutive frames.

148 **Micropattern fabrication.** Micropatterned adhesive surfaces were generated using the PRIMO optical module (Alvéole, France)  
149 controlled by the Leonardo plugin (V3.3, Alveole) mounted on a Nikon TI-E inverted microscope (Nikon Instruments) equipped with a  
150 Super Plan Fluor 20 $\times$  ELWD lens (Nikon) lens and a DMD-based UV (375 nm). Crossbow-shaped micropatterns (length 35  $\mu\text{m}$ , width  
151 17.5  $\mu\text{m}$ , radius 17.5  $\mu\text{m}$ ) were projected onto plasma-cleaned (Corona Treater, ETP), PLLgPEG-passivated (0.1 mg/ml PLL-g-PEG  
152 (PLL (20)-g [3.5]- PEG (2), SuSoS) 35 mm glass-bottom dishes (Ibidi). Patterned areas were then washed multiple times with PBS and  
153 conjugated with a uniform coating of 10  $\mu\text{g}/\text{ml}$  fibronectin for 1 h at 37 °C. The substrates were then washed with PBS, prior to seeding  
154 10000 transfected fibroblast cells onto each 35 mm dish. Cells were allowed to adhere on the patterns for 16 h, at which time they fixed  
155 and processed for immunofluorescence and quantification analyses.

156 **Immunofluorescence stainings and confocal microscopy.** Cells were fixed in 4 °C paraformaldehyde, permeabilized with 0.3 %  
157 Triton X-100 in PBS, and blocked in 5 % bovine serum albumin (BSA). Samples were subsequently incubated overnight in primary  
158 antibody in 1 % BSA/0.3 % Triton X-100/PBS, followed by washing in PBS and incubation in secondary antibody in 1 % BSA/0.3 % Triton  
159 X-100/PBS. Finally, samples were mounted in Elvanol. The following antibodies were used:  $\alpha$ -parvin (Cell Signaling; 4026; 1:100),  
160 phospho-Myosin Light Chain 2 (Thr18/Ser19) (Cell Signaling; 3674; 1:200), Paxillin (BD Transduction Laboratories; 610051; 1:300).  
161 Alexa Fluor 568 and 647 conjugated secondary antibodies (1:300, all from Invitrogen). Actin was labeled with Alexa Fluor 568 (Invitrogen;  
162 A12380 1:600), or 647-conjugated phalloidin (Invitrogen; A22287 1:100). All fluorescence images were collected by laser scanning  
163 confocal microscopy (SP8X; Leica) with Leica Application Suite software (LAS X version 2.0.0.14332), using 63 $\times$  oil-immersion objective.  
164 Images were acquired at room temperature using sequential scanning of frames of 0.3  $\mu\text{m}$  thick confocal planes (pinhole 1) after which  
165 5 planes encompassing complete cell focal adhesions or actin stress fibers were projected as a maximum intensity confocal stack.  
166 Images were collected with the same settings for all samples within an experiment. Quantification of adhesion areas was performed  
167 using Fiji (29). First, ILK, or paxillin focal adhesions were identified using intensity-based thresholding (threshold area set to 10 pixels).  
168 Subsequently, focal adhesion surface area was measured by Analyze particle tools in Fiji. The cell area (in  $\mu\text{m}^2$ ) was measured by  
169 manually tracing the cell boundary given by adhesions, phalloidin, and pMLC2 stainings. The number of focal adhesions were normalized  
170 by the corresponding cell area.

171 **Statistical Analysis.** Statistical analyses were performed using GraphPad Prism software (GraphPad, version 8) and Python. Statistical  
172 significance was determined by the specific tests indicated in the corresponding figure legends. All experiments presented in the  
173 manuscript were repeated at least in 3 independent experiments/biological replicates. No datapoints were excluded from the analyses.

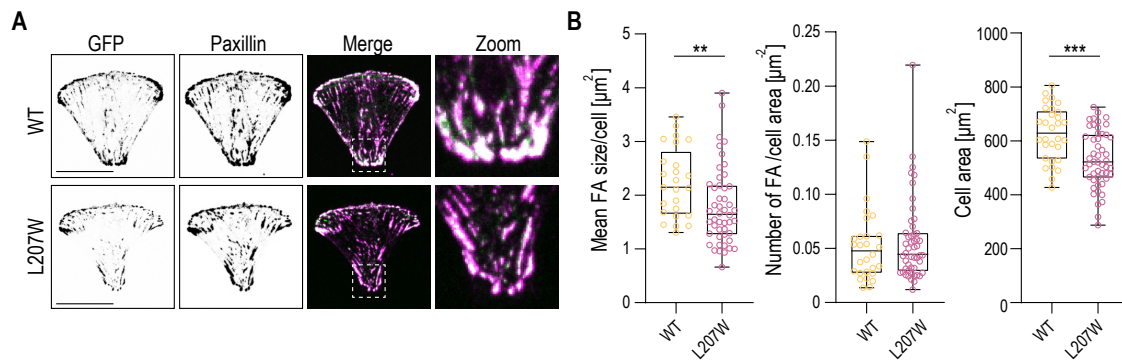

**Fig. S1.** (A) Representative immunofluorescence images of ILK(WT)-GFP and ILK(L207W)-GFP cells stained with paxillin on crossbow micropatterned surfaces. Paxillin localizes at focal adhesions both in ILK(WT)-GFP and ILK(L207W)-GFP cells. (B) Quantification of focal adhesion size/cell, number of focal adhesion/cell and cell area. ( $n > 25$  cells/condition pooled across 4 independent experiments. \*\* $p = 0.0052$ , \*\*\* $p = 0.0004$ , Mann-Whitney). Scale bars  $20 \mu\text{m}$ .

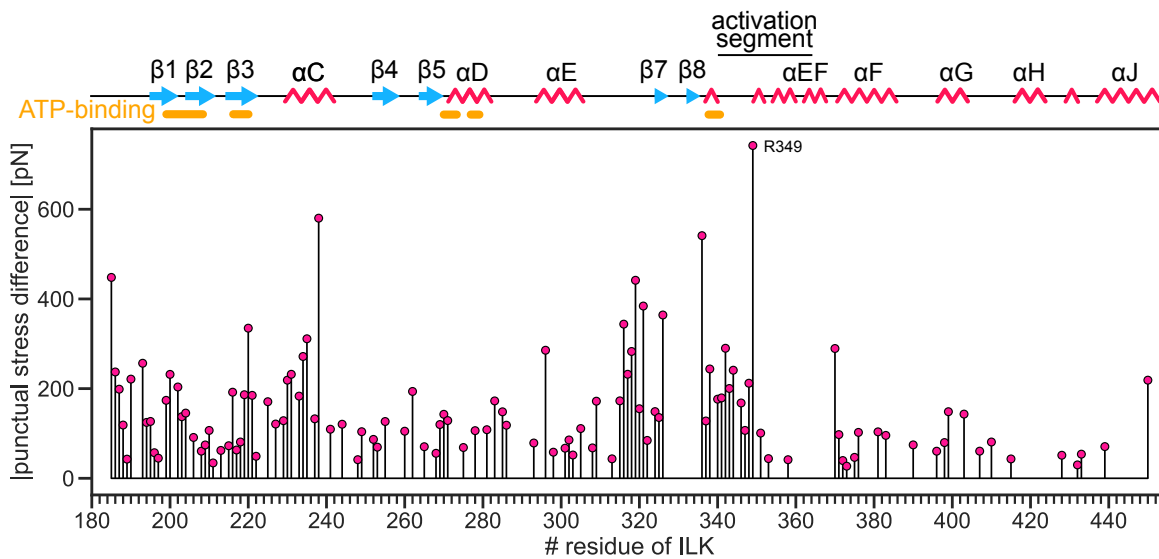

**Fig. S2.** Absolute differences in punctual stress between holo and apo ILK (only statistically significant differences across 20 independent simulations are shown;  $p < 0.05$ , Mann-Whitney test). Secondary structure elements and ATP-binding patches are indicated.

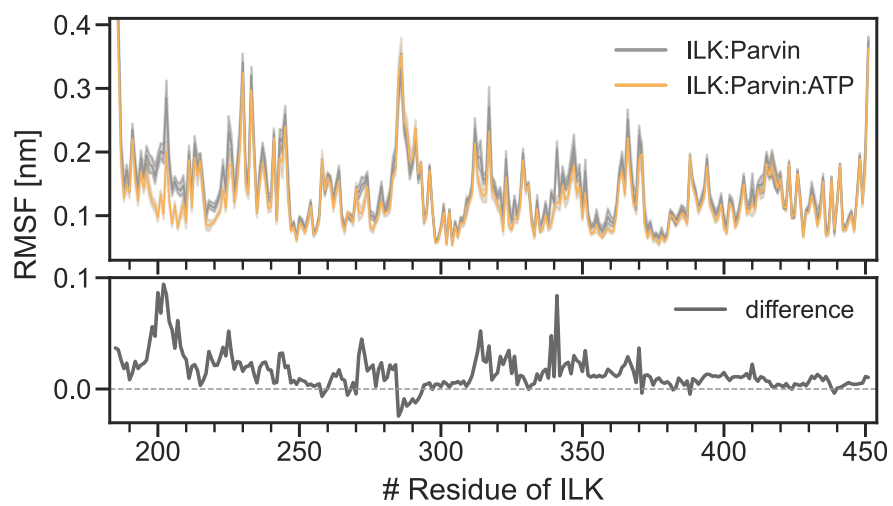

**Fig. S3.** Root mean square fluctuation (RMSF) of ILK holo (orange) and apo (grey) computed for the backbone atoms are shown as a function of residue number. Error bands denote the 95 % confidence interval.

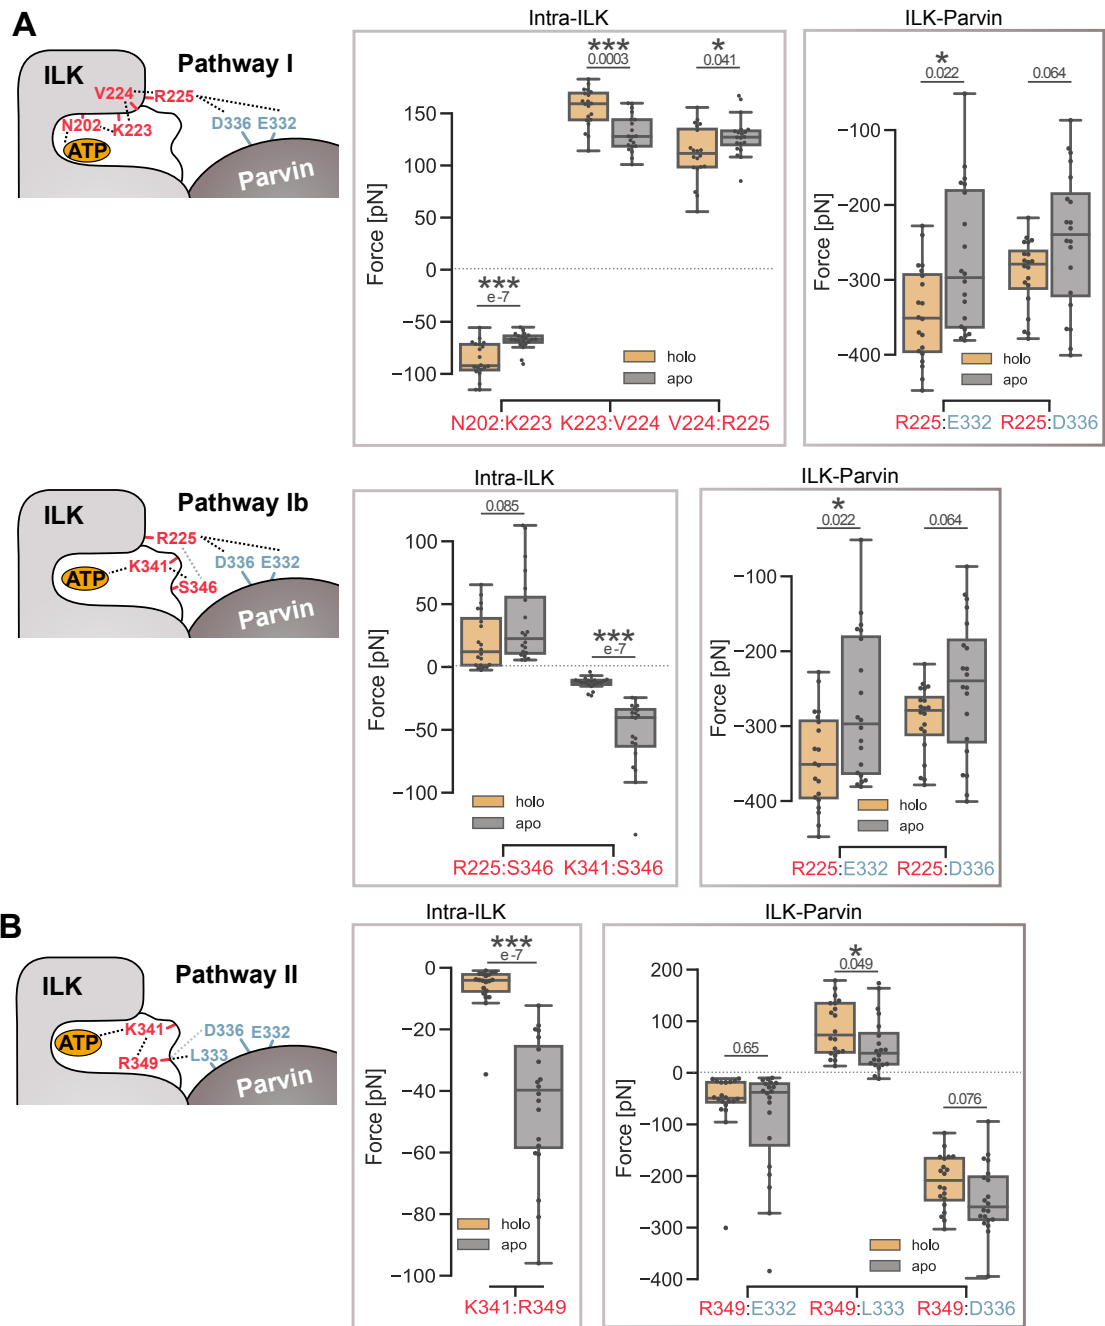

**Fig. S4.** ATP-dependent pathways of internal force propagation between ILK and parvin. Average pairwise forces between the indicated residue pairs are calculated from FDA for 20 individual runs compared between the apo and holo complex. Statistical significance determined by Mann-Whitney test. Positive and negative force values indicate repulsion and attraction, respectively. (A) Pathway I and pathway Ib (not quite statistically significant) involving the saltbridge-forming residue R225. (B) Pathway II involving the saltbridge-forming residue R349.



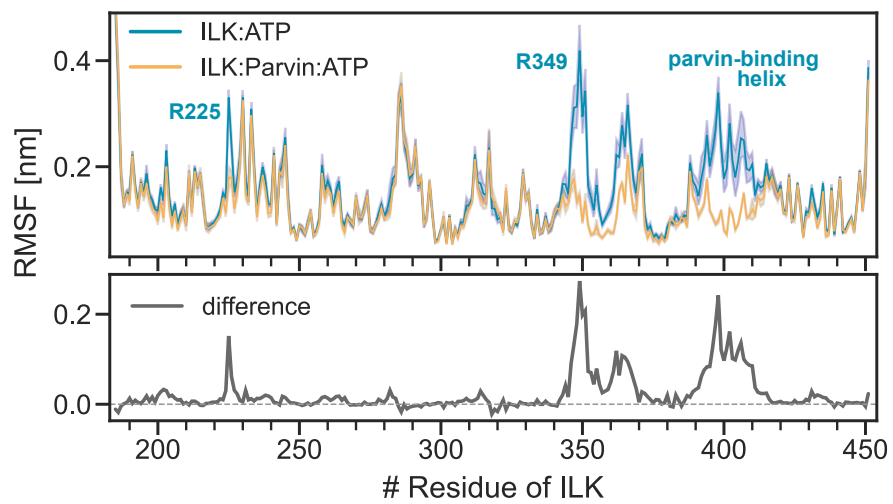

**Fig. S5.** Root mean square fluctuation (RMSF) of ILK in complex with parvin(orange) and without (cyan) computed for the backbone atoms are shown as a function of residue number. Error bands denote the 95% confidence interval.

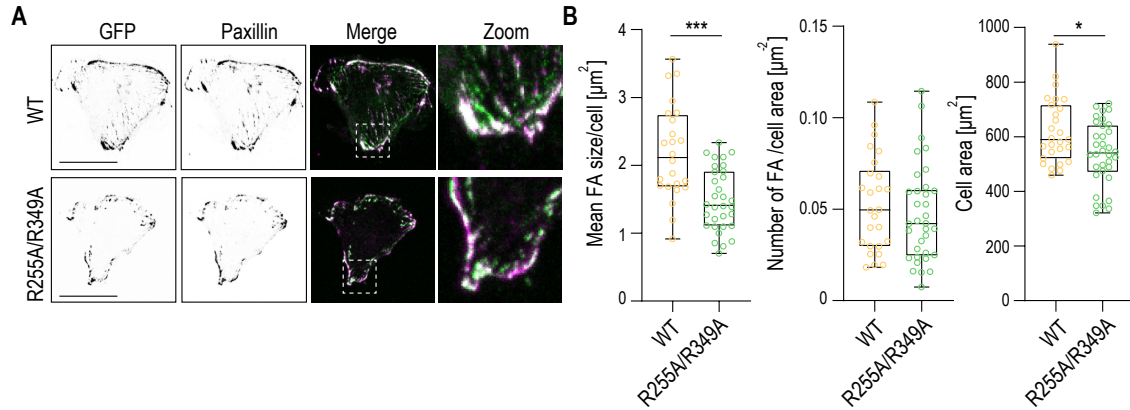

**Fig. S6.** (A) Representative immunofluorescence images of ILK(WT)-GFP and ILK(R255A/R349A)-GFP cells stained with paxillin on crossbow micropatterned surfaces. Paxillin localizes to focal adhesions both in ILK(WT)-GFP and ILK(R255A/R349A)-GFP cells (right panels). (B) Quantification of focal adhesion size and number ( $n > 24$  cells/condition pooled across 4 independent experiments. \*\*\* $p = 0.0001$ , \* $p = 0.0260$ , Mann-Whitney). Scale bars  $20 \mu\text{m}$

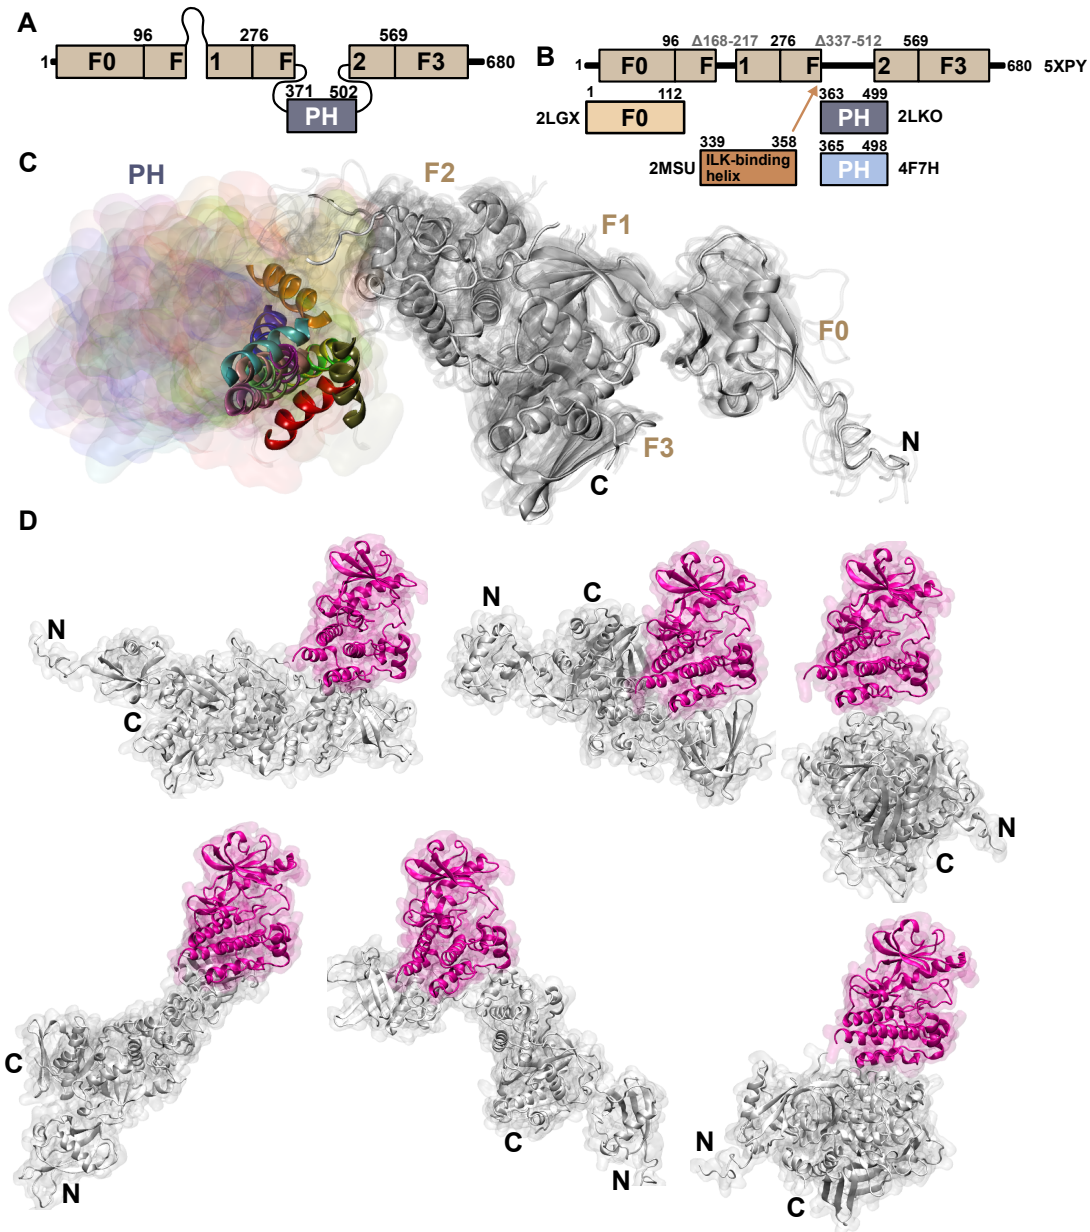

**Fig. S7.** Kindlin-2 modeling and ILK:kindlin-2 docking. (A) Schematic overview of full kindlin-2. (B) Schematic overview of available kindlin-2 partial crystal structures with pdb-codes. (C) Full human kindlin-2 homology models with different placements of PH-domains in surface representation in different colors. For visualization purposes one helix within the PH-domain represented in cartoon. (D) 6 exemplaric ILK:kindlin-2 docking poses from guided docking. ILK in pink and kindlin-2 in light grey. N- and C-terminus of kindlin-2 are labeled.

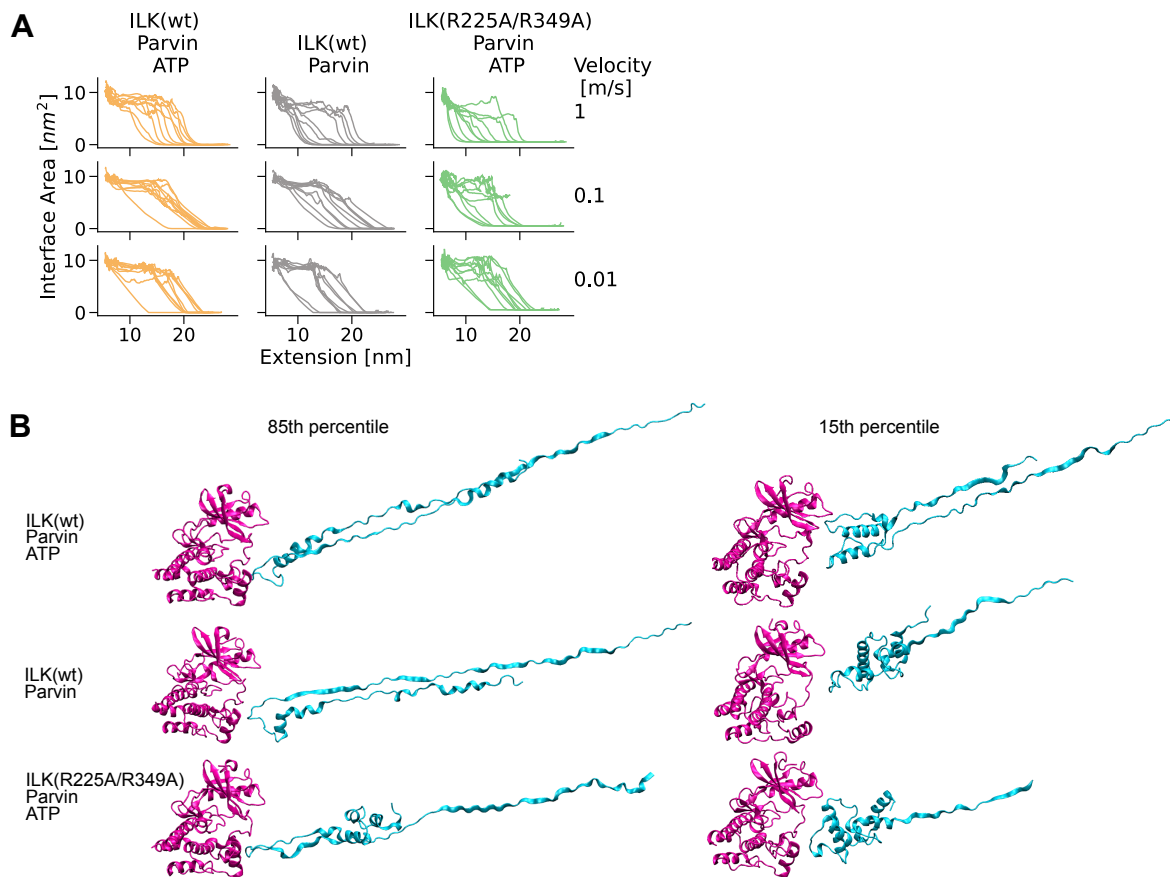

**Fig. S8.** ILK:parvin complex under mechanical force. (A) ILK:parvin interface area as a function of extension between the two force application patches for ILK(WT) holo and apo and ILK(R225A/R349A) at three different pulling velocities from  $1 \text{ m s}^{-1}$  to  $0.01 \text{ m s}^{-1}$ . Trajectories are smoothed with a rolling average. (B) Snapshots at the time of complex dissociation indicating the 15th and 85th percentile of each distribution.

| ID1 | Protein | ID2 | Protein | difference pairwise force [pN] | p-value     |
|-----|---------|-----|---------|--------------------------------|-------------|
| 186 | ILK     | 187 | ILK     | -16.38                         | 0.031517102 |
| 190 | ILK     | 192 | ILK     | -16.93                         | 5.89592E-05 |
| 193 | ILK     | 217 | ILK     | -18.16                         | 0.001014099 |
| 193 | ILK     | 219 | ILK     | 18.75                          | 1.10447E-05 |
| 194 | ILK     | 195 | ILK     | -22.79                         | 0.004320184 |
| 194 | ILK     | 211 | ILK     | -43.21                         | 0.000509073 |
| 195 | ILK     | 208 | ILK     | -18.89                         | 1.80745E-05 |
| 197 | ILK     | 209 | ILK     | 44.86                          | 0.000103734 |
| 198 | ILK     | 199 | ILK     | -36.32                         | 1.10447E-05 |
| 198 | ILK     | 200 | ILK     | -26.57                         | 6.79562E-08 |
| 199 | ILK     | 200 | ILK     | 99.66                          | 6.79562E-08 |
| 199 | ILK     | 208 | ILK     | -21.41                         | 6.79562E-08 |
| 199 | ILK     | 271 | ILK     | 22.23                          | 3.70512E-05 |
| 199 | ILK     | 323 | ILK     | 33.04                          | 6.79562E-08 |
| 200 | ILK     | 201 | ILK     | 128.52                         | 6.79562E-08 |
| 200 | ILK     | 202 | ILK     | 124.32                         | 6.79562E-08 |
| 200 | ILK     | 206 | ILK     | 16.73                          | 0.000247061 |
| 200 | ILK     | 207 | ILK     | -57.99                         | 2.35566E-06 |
| 200 | ILK     | 220 | ILK     | 85.98                          | 6.79562E-08 |
| 200 | ILK     | 283 | ILK     | 18.37                          | 5.22689E-07 |
| 200 | ILK     | 323 | ILK     | -20.14                         | 0.001782376 |
| 201 | ILK     | 202 | ILK     | 24.72                          | 0.002341273 |
| 201 | ILK     | 205 | ILK     | 34.27                          | 7.89803E-08 |
| 201 | ILK     | 206 | ILK     | 53.72                          | 9.17277E-08 |
| 201 | ILK     | 223 | ILK     | -56.78                         | 6.0148E-07  |
| 202 | ILK     | 204 | ILK     | -56.31                         | 0.000509073 |
| 202 | ILK     | 205 | ILK     | -61.46                         | 0.000160981 |
| 202 | ILK     | 220 | ILK     | 62.63                          | 3.49946E-06 |
| 202 | ILK     | 223 | ILK     | -18.74                         | 0.000115901 |
| 202 | ILK     | 323 | ILK     | 16.67                          | 1.65708E-07 |
| 202 | ILK     | 351 | ILK     | -31.39                         | 0.005115262 |
| 203 | ILK     | 204 | ILK     | 42.72                          | 0.000562904 |
| 203 | ILK     | 341 | ILK     | 15.32                          | 0.001348582 |
| 204 | ILK     | 220 | ILK     | 65.63                          | 6.79562E-08 |
| 204 | ILK     | 223 | ILK     | 53.39                          | 3.29311E-05 |
| 204 | ILK     | 341 | ILK     | 28.09                          | 4.16576E-05 |
| 204 | ILK     | 345 | ILK     | -23.17                         | 0.022269911 |
| 205 | ILK     | 206 | ILK     | -77.52                         | 1.23464E-07 |
| 205 | ILK     | 221 | ILK     | -32.38                         | 0.000160981 |
| 206 | ILK     | 207 | ILK     | -25.08                         | 0.003638826 |
| 206 | ILK     | 208 | ILK     | -24.74                         | 1.57567E-06 |
| 206 | ILK     | 220 | ILK     | 124.52                         | 9.17277E-08 |
| 206 | ILK     | 221 | ILK     | -51.21                         | 0.00037499  |
| 206 | ILK     | 223 | ILK     | 83.74                          | 2.21776E-07 |
| 207 | ILK     | 208 | ILK     | 145.09                         | 9.12665E-07 |
| 207 | ILK     | 218 | ILK     | 77.75                          | 6.79562E-08 |
| 207 | ILK     | 219 | ILK     | 57.78                          | 1.80297E-06 |
| 207 | ILK     | 220 | ILK     | 123.34                         | 1.91771E-07 |
| 208 | ILK     | 209 | ILK     | -35.12                         | 0.002798602 |
| 208 | ILK     | 218 | ILK     | 35.85                          | 2.92486E-05 |
| 208 | ILK     | 219 | ILK     | -63.12                         | 7.57738E-06 |
| 209 | ILK     | 216 | ILK     | 21.64                          | 2.0616E-06  |
| 209 | ILK     | 218 | ILK     | 28.88                          | 1.20089E-06 |
| 209 | ILK     | 271 | ILK     | -50.35                         | 7.89803E-08 |
| 210 | ILK     | 217 | ILK     | -22.44                         | 0.000304799 |
| 211 | ILK     | 212 | ILK     | 24.34                          | 0.001014099 |
| 211 | ILK     | 216 | ILK     | 41.67                          | 0.016668799 |
| 212 | ILK     | 217 | ILK     | -23.13                         | 0.000144383 |
| 216 | ILK     | 217 | ILK     | 56.04                          | 3.70512E-05 |
| 216 | ILK     | 270 | ILK     | -17.65                         | 0.001014099 |
| 216 | ILK     | 271 | ILK     | -58.23                         | 6.79562E-08 |
| 217 | ILK     | 218 | ILK     | 170.17                         | 6.79562E-08 |
| 217 | ILK     | 219 | ILK     | -25.86                         | 6.61045E-05 |
| 217 | ILK     | 254 | ILK     | 21.88                          | 0.001480977 |
| 217 | ILK     | 268 | ILK     | -35.18                         | 2.0616E-06  |
| 217 | ILK     | 270 | ILK     | 20.75                          | 2.56295E-07 |
| 217 | ILK     | 271 | ILK     | -21.35                         | 0.000199707 |
| 218 | ILK     | 219 | ILK     | -40.88                         | 0.01929238  |
| 218 | ILK     | 268 | ILK     | 62.09                          | 9.12665E-07 |
| 218 | ILK     | 269 | ILK     | -118.51                        | 2.56295E-07 |
| 218 | ILK     | 271 | ILK     | -18.88                         | 0.013320516 |
| 219 | ILK     | 220 | ILK     | -66.66                         | 1.57567E-06 |
| 219 | ILK     | 267 | ILK     | -33.75                         | 0.000920913 |
| 219 | ILK     | 268 | ILK     | 47.33                          | 0.002341273 |
| 220 | ILK     | 221 | ILK     | -16.43                         | 0.006557193 |
| 220 | ILK     | 266 | ILK     | 25.09                          | 0.000115901 |
| 220 | ILK     | 267 | ILK     | -33.81                         | 0.01929238  |
| 220 | ILK     | 338 | ILK     | -30.99                         | 0.001480977 |
| 220 | ILK     | 339 | ILK     | 259.93                         | 6.79562E-08 |
| 220 | ILK     | 340 | ILK     | 76.02                          | 6.79562E-08 |
| 220 | ILK     | 341 | ILK     | 58.81                          | 6.79562E-08 |
| 222 | ILK     | 223 | ILK     | -31.91                         | 0.001227183 |
| 222 | ILK     | 224 | ILK     | -30.25                         | 4.53897E-07 |
| 222 | ILK     | 264 | ILK     | -36.15                         | 3.0691E-06  |
| 222 | ILK     | 265 | ILK     | -22.72                         | 0.031517102 |
| 222 | ILK     | 342 | ILK     | -39.45                         | 2.56295E-07 |
| 222 | ILK     | 345 | ILK     | 18.33                          | 0.03851496  |
| 223 | ILK     | 224 | ILK     | 24.88                          | 0.000338195 |
| 224 | ILK     | 225 | ILK     | -16.27                         | 0.041123594 |
| 225 | ILK     | 227 | ILK     | 27.78                          | 0.031517102 |
| 225 | ILK     | 332 | Parvin  | -71.31                         | 0.022269911 |
| 226 | ILK     | 335 | Parvin  | 22.21                          | 0.007113494 |
| 227 | ILK     | 228 | ILK     | 28.3                           | 0.000338195 |

|     |     |     |     |        |             |
|-----|-----|-----|-----|--------|-------------|
| 227 | ILK | 259 | ILK | -23.45 | 0.036048327 |
| 229 | ILK | 233 | ILK | 23.12  | 0.041123594 |
| 232 | ILK | 259 | ILK | 46.86  | 0.000247061 |
| 234 | ILK | 235 | ILK | -23.63 | 0.036048327 |
| 235 | ILK | 256 | ILK | 15.69  | 0.002798602 |
| 235 | ILK | 257 | ILK | -17.18 | 0.036048327 |
| 235 | ILK | 266 | ILK | 33.04  | 0.000247061 |
| 235 | ILK | 267 | ILK | -29.47 | 0.000160981 |
| 235 | ILK | 342 | ILK | 35.44  | 5.87357E-06 |
| 236 | ILK | 240 | ILK | 25.29  | 0.000160981 |
| 237 | ILK | 240 | ILK | 15.77  | 0.008354827 |
| 238 | ILK | 242 | ILK | -25.11 | 0.002139261 |
| 239 | ILK | 256 | ILK | 37.45  | 3.70512E-05 |
| 239 | ILK | 267 | ILK | -16.72 | 0.001348582 |
| 239 | ILK | 342 | ILK | 16.47  | 0.00604033  |
| 240 | ILK | 243 | ILK | 31.4   | 0.000274511 |
| 250 | ILK | 337 | ILK | -22.47 | 0.022269911 |
| 251 | ILK | 269 | ILK | -27.93 | 0.004702533 |
| 251 | ILK | 272 | ILK | 34.49  | 7.57738E-06 |
| 252 | ILK | 269 | ILK | 24.74  | 0.033717669 |
| 253 | ILK | 267 | ILK | 28.54  | 2.92486E-05 |
| 254 | ILK | 268 | ILK | -86.48 | 0.000920913 |
| 255 | ILK | 267 | ILK | 24.3   | 0.000199707 |
| 256 | ILK | 267 | ILK | -22.03 | 0.020734594 |
| 257 | ILK | 265 | ILK | 21.2   | 0.00556046  |
| 258 | ILK | 259 | ILK | -32.62 | 0.000920913 |
| 258 | ILK | 262 | ILK | -35.17 | 0.000415502 |
| 259 | ILK | 265 | ILK | -18.15 | 0.004320184 |
| 262 | ILK | 264 | ILK | -17.29 | 4.16576E-05 |
| 264 | ILK | 266 | ILK | 18.83  | 0.003966239 |
| 267 | ILK | 268 | ILK | -43.51 | 0.000460073 |
| 267 | ILK | 338 | ILK | -57.57 | 3.41558E-07 |
| 268 | ILK | 269 | ILK | -34.37 | 0.011432829 |
| 269 | ILK | 270 | ILK | -50.5  | 2.92486E-05 |
| 270 | ILK | 271 | ILK | 53.32  | 0.000144383 |
| 271 | ILK | 272 | ILK | -34.58 | 0.009045397 |
| 272 | ILK | 275 | ILK | -52.32 | 3.29311E-05 |
| 272 | ILK | 326 | ILK | 78.23  | 2.35566E-06 |
| 272 | ILK | 327 | ILK | -38.48 | 5.16578E-06 |
| 272 | ILK | 328 | ILK | -26.61 | 3.70512E-05 |
| 272 | ILK | 334 | ILK | -23.08 | 0.000338195 |
| 273 | ILK | 274 | ILK | 73.03  | 0.000247061 |
| 273 | ILK | 275 | ILK | -19.96 | 6.61045E-05 |
| 276 | ILK | 277 | ILK | 22.45  | 0.027483422 |
| 276 | ILK | 278 | ILK | 70.97  | 2.68977E-06 |
| 276 | ILK | 322 | ILK | 19.16  | 0.000835717 |
| 276 | ILK | 325 | ILK | 34.57  | 0.006557193 |
| 276 | ILK | 326 | ILK | 83.08  | 5.16578E-06 |
| 277 | ILK | 281 | ILK | 44.46  | 0.022269911 |
| 277 | ILK | 322 | ILK | -24.4  | 0.025639272 |
| 277 | ILK | 325 | ILK | -36.37 | 0.001348582 |
| 278 | ILK | 283 | ILK | -32.07 | 0.000460073 |
| 278 | ILK | 323 | ILK | -48.33 | 9.27796E-05 |
| 279 | ILK | 284 | ILK | 22.05  | 0.003966239 |
| 282 | ILK | 283 | ILK | 36.73  | 0.005115262 |
| 282 | ILK | 389 | ILK | 22.03  | 0.04986369  |
| 283 | ILK | 323 | ILK | 44.59  | 0.002139261 |
| 296 | ILK | 300 | ILK | -38.04 | 0.023903146 |
| 296 | ILK | 451 | ILK | 27.75  | 0.003638826 |
| 298 | ILK | 301 | ILK | 20.67  | 0.033717669 |
| 300 | ILK | 304 | ILK | -18.82 | 0.014363848 |
| 300 | ILK | 332 | ILK | 16.48  | 0.046791615 |
| 301 | ILK | 381 | ILK | 18.72  | 0.043880384 |
| 305 | ILK | 306 | ILK | -17.13 | 0.007711805 |
| 307 | ILK | 310 | ILK | 16.37  | 0.043880384 |
| 307 | ILK | 311 | ILK | -32.93 | 0.003336179 |
| 308 | ILK | 309 | ILK | 22.85  | 0.002798602 |
| 308 | ILK | 335 | ILK | 17.76  | 0.000835717 |
| 311 | ILK | 315 | ILK | -19.88 | 0.023903146 |
| 312 | ILK | 317 | ILK | 15.55  | 0.022207185 |
| 315 | ILK | 340 | ILK | 16.19  | 0.031517102 |
| 317 | ILK | 340 | ILK | 23.39  | 0.009786487 |
| 317 | ILK | 366 | ILK | 26.95  | 0.001782376 |
| 317 | ILK | 374 | ILK | 54.25  | 0.036048327 |
| 318 | ILK | 324 | ILK | -33.84 | 0.006557193 |
| 318 | ILK | 335 | ILK | -41.81 | 0.000509073 |
| 318 | ILK | 340 | ILK | 21.33  | 0.025639272 |
| 318 | ILK | 341 | ILK | 27.66  | 0.011432829 |
| 319 | ILK | 324 | ILK | 37     | 0.000686822 |
| 319 | ILK | 339 | ILK | -32.15 | 0.000562904 |
| 320 | ILK | 321 | ILK | 67.16  | 0.000144383 |
| 320 | ILK | 377 | ILK | 52.01  | 0.000757881 |
| 320 | ILK | 378 | ILK | -29.61 | 0.003056629 |
| 321 | ILK | 323 | ILK | 60.47  | 0.001115947 |
| 321 | ILK | 325 | ILK | -32.49 | 0.013320516 |
| 321 | ILK | 339 | ILK | 26.37  | 0.001782376 |
| 321 | ILK | 355 | ILK | 64.66  | 0.001480977 |
| 321 | ILK | 381 | ILK | 26.23  | 0.000686822 |
| 322 | ILK | 323 | ILK | -48.68 | 0.01929238  |
| 322 | ILK | 324 | ILK | -28.73 | 0.000247061 |
| 322 | ILK | 381 | ILK | 32.78  | 0.002341273 |
| 322 | ILK | 384 | ILK | 85     | 4.54008E-06 |
| 323 | ILK | 324 | ILK | -54.77 | 0.001115947 |
| 323 | ILK | 326 | ILK | 52.39  | 2.56295E-07 |
| 323 | ILK | 339 | ILK | 63.3   | 0.000415502 |
| 323 | ILK | 355 | ILK | -22.34 | 0.000129405 |

|     |        |     |        |         |             |
|-----|--------|-----|--------|---------|-------------|
| 323 | ILK    | 384 | ILK    | 67.31   | 0.023903146 |
| 324 | ILK    | 335 | ILK    | -16.84  | 0.007711805 |
| 324 | ILK    | 336 | ILK    | 62.02   | 0.04986369  |
| 325 | ILK    | 326 | ILK    | -35.23  | 0.029440884 |
| 325 | ILK    | 334 | ILK    | -21     | 0.007113494 |
| 326 | ILK    | 327 | ILK    | 49.2    | 0.003638826 |
| 326 | ILK    | 333 | ILK    | 28.94   | 0.001625258 |
| 326 | ILK    | 334 | ILK    | 30.84   | 0.031517102 |
| 326 | ILK    | 336 | ILK    | 19.12   | 0.041123594 |
| 326 | ILK    | 339 | ILK    | -30.83  | 6.0148E-07  |
| 328 | ILK    | 332 | ILK    | -36.78  | 0.009045397 |
| 335 | ILK    | 336 | ILK    | 94.34   | 0.000115901 |
| 336 | ILK    | 339 | ILK    | 34.29   | 0.001227183 |
| 337 | ILK    | 338 | ILK    | -54.5   | 0.003336179 |
| 337 | ILK    | 339 | ILK    | 79.45   | 0.000144383 |
| 338 | ILK    | 339 | ILK    | 55.18   | 0.001782376 |
| 338 | ILK    | 340 | ILK    | -119.49 | 1.91771E-07 |
| 338 | ILK    | 341 | ILK    | -33.41  | 6.79562E-08 |
| 339 | ILK    | 341 | ILK    | -113.25 | 0.000222203 |
| 340 | ILK    | 342 | ILK    | -41.42  | 2.0616E-06  |
| 341 | ILK    | 345 | ILK    | 54.02   | 2.0616E-06  |
| 341 | ILK    | 346 | ILK    | 40.31   | 6.79562E-08 |
| 341 | ILK    | 349 | ILK    | 37.75   | 1.91771E-07 |
| 341 | ILK    | 351 | ILK    | -15.24  | 3.70512E-05 |
| 342 | ILK    | 345 | ILK    | 122.12  | 1.20089E-06 |
| 343 | ILK    | 345 | ILK    | -42.76  | 5.89592E-05 |
| 345 | ILK    | 346 | ILK    | 63.7    | 0.000222203 |
| 348 | ILK    | 349 | ILK    | -54.93  | 0.001953348 |
| 349 | ILK    | 333 | Parvin | 32.97   | 0.04986369  |
| 355 | ILK    | 356 | ILK    | 26.1    | 0.036048327 |
| 355 | ILK    | 377 | ILK    | 59.59   | 1.59972E-05 |
| 355 | ILK    | 384 | ILK    | 48.48   | 0.03851496  |
| 359 | ILK    | 360 | ILK    | -24.99  | 0.000509073 |
| 364 | ILK    | 311 | Parvin | -19.72  | 0.007711805 |
| 365 | ILK    | 366 | ILK    | -16.05  | 0.003336179 |
| 366 | ILK    | 370 | ILK    | 21.95   | 0.016668799 |
| 370 | ILK    | 373 | ILK    | 20.31   | 0.020734594 |
| 370 | ILK    | 374 | ILK    | -97.79  | 0.004702533 |
| 372 | ILK    | 433 | ILK    | 16.4    | 0.013320516 |
| 376 | ILK    | 377 | ILK    | 22.8    | 0.006557193 |
| 380 | ILK    | 381 | ILK    | 29.64   | 0.027483422 |
| 380 | ILK    | 383 | ILK    | 26.85   | 0.025639272 |
| 390 | ILK    | 391 | ILK    | 35.67   | 0.000103734 |
| 392 | ILK    | 393 | ILK    | -19.31  | 0.031517102 |
| 397 | ILK    | 398 | ILK    | -16.7   | 0.010581211 |
| 397 | ILK    | 401 | ILK    | -15.1   | 0.002341273 |
| 399 | ILK    | 403 | ILK    | 33.51   | 0.001953348 |
| 400 | ILK    | 401 | ILK    | 32.92   | 0.003966239 |
| 400 | ILK    | 404 | ILK    | -24.26  | 0.00604033  |
| 408 | ILK    | 409 | ILK    | -16.62  | 0.015478602 |
| 432 | ILK    | 436 | ILK    | -16.32  | 0.03851496  |
| 436 | ILK    | 437 | ILK    | -17.5   | 0.033717669 |
| 450 | ILK    | 451 | ILK    | -33.86  | 0.000415502 |
| 254 | Parvin | 362 | Parvin | 17.78   | 0.01929238  |
| 285 | Parvin | 287 | Parvin | 31.15   | 0.046791615 |
| 291 | Parvin | 352 | Parvin | 16.99   | 0.000103734 |
| 292 | Parvin | 294 | Parvin | 25.06   | 0.002139261 |
| 296 | Parvin | 300 | Parvin | -17.37  | 0.015478602 |
| 299 | Parvin | 300 | Parvin | 40.85   | 0.001480977 |
| 308 | Parvin | 313 | Parvin | 19.37   | 0.005115262 |
| 309 | Parvin | 311 | Parvin | 34.06   | 0.004702533 |
| 310 | Parvin | 312 | Parvin | -18.48  | 0.001625258 |
| 328 | Parvin | 332 | Parvin | 21.7    | 0.043880384 |
| 331 | Parvin | 334 | Parvin | -15.69  | 0.001782376 |
| 331 | Parvin | 335 | Parvin | 31.26   | 0.006557193 |
| 332 | Parvin | 335 | Parvin | -52.9   | 1.80745E-05 |
| 333 | Parvin | 335 | Parvin | -21.47  | 0.013320516 |
| 333 | Parvin | 336 | Parvin | -25.48  | 0.027483422 |
| 333 | Parvin | 337 | Parvin | 39.47   | 0.001953348 |
| 334 | Parvin | 335 | Parvin | 49.79   | 0.003056629 |
| 334 | Parvin | 336 | Parvin | -16.11  | 0.007113494 |
| 334 | Parvin | 339 | Parvin | 23.5    | 0.027483422 |
| 336 | Parvin | 337 | Parvin | -33.96  | 0.002798602 |
| 336 | Parvin | 338 | Parvin | 27.38   | 0.020734594 |
| 339 | Parvin | 340 | Parvin | 29.53   | 0.008354827 |
| 343 | Parvin | 344 | Parvin | 17.88   | 0.010581211 |
| 344 | Parvin | 345 | Parvin | 36.64   | 0.000686822 |
| 345 | Parvin | 346 | Parvin | 28.86   | 0.017938613 |
| 347 | Parvin | 348 | Parvin | -19.89  | 0.020734594 |
| 347 | Parvin | 351 | Parvin | 21.97   | 0.009786487 |
| 348 | Parvin | 349 | Parvin | 31.93   | 0.000686822 |
| 350 | Parvin | 352 | Parvin | 27.12   | 0.007711805 |
| 354 | Parvin | 355 | Parvin | 21.76   | 0.04986369  |
| 356 | Parvin | 357 | Parvin | 15.97   | 0.036048327 |
| 357 | Parvin | 358 | Parvin | 23.12   | 0.046791615 |
| 359 | Parvin | 360 | Parvin | 23.94   | 0.009786487 |
| 364 | Parvin | 368 | Parvin | 55.99   | 0.001625258 |
| 367 | Parvin | 368 | Parvin | 21.08   | 0.041123594 |

Table S1. Differences in pairwise forces between the holo and apo state calculated from FDA (n = 20 independent trajectories, p <0.05, Mann-Whitney).

174 **Movie S1.** ILK large-scale motions captured by PC1 ("inter-lobe wringing motion") extracted from PCA. Interpolation between  
175 the extreme conformations (red and blue) along PC1. ILK is shown as C- $\alpha$  traces. See also Figure 1D.

176 **Movie S2.** ILK large-scale motions captured by PC2 ("lobe clamping motion") extracted from PCA. Interpolation between the  
177 extreme conformations (red and blue) along PC2. ILK is shown as C- $\alpha$  traces. See also Figure 1D.

178 **Movie S3.** Representative movies of ILK(WT)-GFP (left) and ILK(L207W)-GFP cells (right) shown in Fig. 2D and imaged on  
179 8 kPa substrates. Arrowheads and asterisks (in magenta) indicate adhesion growth and adhesion disassembly, respectively.  
180 Frame rate 1 min/frame. Scale bar 20  $\mu$ m.

181 **Movie S4.** Representative movies of ILK(WT)-GFP (left) and ILK(L207W)-GFP cells (right) shown in Fig. 2D and imaged on  
182 40 kPa substrates. Arrowheads and asterisks (in magenta) indicate adhesion growth and adhesion disassembly, respectively.  
183 Frame rate 1 min/frame. Scale bar 20  $\mu$ m.

184 **Movie S5.** Representative movies of ILK(WT)GFP (left) and ILK(R255A/R349A)-GFP cells (right) shown in Fig. 4D and imaged  
185 on 8 kPa substrates. Arrowheads and asterisks (in magenta) indicate adhesion growth and adhesion disassembly, respec-  
186 tively. Frame rate 1 min/frame. Scale bar 20  $\mu$ m.

187 **Movie S6.** Representative movies of ILK(WT)GFP (left) and ILK(R255A/R349A)-GFP cells (right) shown in Fig. 4D and im-  
188 aged on 40 kPa substrates. Arrowheads and asterisks (in magenta) indicate adhesion growth and adhesion disassembly,  
189 respectively. Frame rate 1 min/frame. Scale bar 20  $\mu$ m.

190 **Movie S7.** Example of ILK(pink):parvin(cyan) dissociation after significant parvin unfolding in force-probe MD simulations as  
191 exemplified here by the holo complex, where this behavior is more commonly observed. Residues investigated in this study  
192 are shown in ball-and-stick representation, the pulling patch for constant velocity pulling with 1 m/s is indicated in dark grey.

193 **Movie S8.** Example of ILK(pink):parvin(cyan) dissociation after marginal parvin unfolding in force-probe MD simulations as  
194 exemplified here by the apo complex, where this behavior is more commonly observed. Residues investigated in this study  
195 are shown in ball-and-stick representation, the pulling patch for constant velocity pulling with 1 m/s is indicated in dark grey.

196 **Movie S9.** Example of ILK(pink):parvin(cyan) dissociation with no parvin unfolding in force-probe MD simulations as exem-  
197 plified here by the ILK(R225A/R349A):parvin holo complex. Residues investigated in this study are shown in ball-and-stick  
198 representation, the pulling patch for constant velocity pulling with 1 m/s is indicated in dark grey.

199 **Movie S10.** Real time imaging of ILK-/-GFP cell migration. Representative movie of ILK-/-GFP cells cultured on glass and  
200 captured by spinning disc time-lapse microscopy at initial (0 h) and 12 h time. Trajectories in magenta and green. Frame rate  
201 30 min/frame. Scale bar 20  $\mu$ m.

202 **Movie S11.** Real time imaging of ILK(WT)-GFP cell migration. Representative movie of ILK(WT)-GFP cells cultured on glass  
203 and captured by spinning disc time-lapse microscopy at initial (0 h) and 12 h time. Trajectory in magenta and green. Frame  
204 rate 30 min/frame. Scale bar 20  $\mu$ m.

205 **Movie S12.** Real time imaging of ILK(L207W)-GFP cell migration. Representative movie of ILK(L207W)-GFP cells cultured on  
206 glass and captured by spinning disc time-lapse microscopy at initial (0 h) and 12 h time. Trajectory in magenta. Frame rate  
207 30 min/frame. Scale bar 20  $\mu$ m.

208 **Movie S13.** Real time imaging of ILK(R255A/R349A)-GFP cell migration. Representative movie of  
209 ILK(R255A/R349A)-GFP cells cultured on glass and captured by spinning disc time-lapse microscopy at initial (0 h) and 12 h  
210 time. Trajectories in magenta and green. Frame rate 30 min/frame. Scale bar 20  $\mu$ m.

## 211 References

- 212 1. K Fukuda, S Gupta, K Chen, C Wu, J Qin, The pseudoactive site of ilk is essential for its binding to alpha-parvin and localization to  
213 focal adhesions. *Mol. cell* **36**, 819–830 (2009).
- 214 2. J Vaynberg, et al., Non-catalytic signaling by pseudokinase ilk for regulating cell adhesion. *Nat. communications* **9**, 4465 (2018).
- 215 3. MJ Abraham, et al., Gromacs: High performance molecular simulations through multi-level parallelism from laptops to supercomput-  
216 ers. *SoftwareX* **1-2**, 19–25 (2015).
- 217 4. RB Best, G Hummer, Optimized molecular dynamics force fields applied to the helix-coil transition of polypeptides. *The journal*  
218 *physical chemistry. B* **113**, 9004–9015 (2009).



- 219 5. AE Aliev, et al., Motional timescale predictions by molecular dynamics simulations: case study using proline and hydroxyproline  
220 sidechain dynamics. *Proteins* **82**, 195–215 (2014).
- 221 6. WL Jorgensen, J Chandrasekhar, JD Madura, RW Impey, ML Klein, Comparison of simple potential functions for simulating liquid  
222 water. *The J. Chem. Phys.* **79**, 926–935 (1983).
- 223 7. KL Meagher, LT Redman, HA Carlson, Development of polyphosphate parameters for use with the amber force field. *J. computational  
224 chemistry* **24**, 1016–1025 (2003).
- 225 8. B Hess, P-lincs: A parallel linear constraint solver for molecular simulation. *J. chemical theory computation* **4**, 116–122 (2008).
- 226 9. G Bussi, D Donadio, M Parrinello, Canonical sampling through velocity rescaling. *The J. Chem. Phys.* **126**, 014101 (2007).
- 227 10. M Parrinello, A Rahman, Polymorphic transitions in single crystals: A new molecular dynamics method. *J. Appl. Phys.* **52**, 7182–7190  
228 (1981).
- 229 11. T Darden, D York, L Pedersen, Particle mesh ewald: An  $n \times \log(n)$  method for ewald sums in large systems. *The J. Chem. Phys.*  
230 **98**, 10089–10092 (1993).
- 231 12. H Li, et al., Structural basis of kindlin-mediated integrin recognition and activation. *Proc. Natl. Acad. Sci. United States Am.* **114**,  
232 9349–9354 (2017).
- 233 13. K Fukuda, et al., Molecular basis of kindlin-2 binding to integrin-linked kinase pseudokinase for regulating cell adhesion. *The J.  
234 biological chemistry* **289**, 28363–28375 (2014).
- 235 14. J Liu, et al., Structural basis of phosphoinositide binding to kindlin-2 protein pleckstrin homology domain in regulating integrin  
236 activation. *The J. biological chemistry* **286**, 43334–43342 (2011).
- 237 15. Y Liu, Y Zhu, S Ye, R Zhang, Crystal structure of kindlin-2 ph domain reveals a conformational transition for its membrane anchoring  
238 and regulation of integrin activation. *Protein & cell* **3**, 434–440 (2012).
- 239 16. HD Perera, et al., Membrane binding of the n-terminal ubiquitin-like domain of kindlin-2 is crucial for its regulation of integrin  
240 activation. *Struct. (London, Engl. : 1993)* **19**, 1664–1671 (2011).
- 241 17. EF Pettersen, et al., Ucsf chimera—a visualization system for exploratory research and analysis. *J. computational chemistry* **25**,  
242 1605–1612 (2004).
- 243 18. P Di Tommaso, et al., T-coffee: a web server for the multiple sequence alignment of protein and rna sequences using structural  
244 information and homology extension. *Nucleic acids research* **39**, W13–7 (2011).
- 245 19. B Webb, A Sali, Comparative protein structure modeling using modeller. *Curr. protocols bioinformatics* **54**, 5.6.1–5.6.37 (2016).
- 246 20. GCP van Zundert, et al., The haddock2.2 web server: User-friendly integrative modeling of biomolecular complexes. *J. molecular  
247 biology* **428**, 720–725 (2016).
- 248 21. YA Kadry, C Huet-Calderwood, B Simon, DA Calderwood, Kindlin-2 interacts with a highly-conserved surface of ilk to regulate focal  
249 adhesion localization and cell spreading. *J. cell science* **131** (2018).
- 250 22. S Lorenz, et al., Structural analysis of the interactions between paxillin Id motifs and alpha-parvin. *Struct. (London, Engl. : 1993)* **16**,  
251 1521–1531 (2008).
- 252 23. X Wang, et al., The structure of alpha-parvin ch2-paxillin Id1 complex reveals a novel modular recognition for focal adhesion  
253 assembly. *The J. biological chemistry* **283**, 21113–21119 (2008).
- 254 24. F Eisenhaber, P Lijnzaad, P Argos, C Sander, M Scharf, The double cubic lattice method: Efficient approaches to numerical  
255 integration of surface area and volume and to dot surface contouring of molecular assemblies. *J. Comput. Chem.* **16**, 273–284  
256 (1995).
- 257 25. W Humphrey, A Dalke, K Schulten, Vmd: visual molecular dynamics. *J. molecular graphics* **14**, 33–8, 27–8 (1996).
- 258 26. CC David, DJ Jacobs, Principal component analysis: a method for determining the essential dynamics of proteins. *Methods  
259 molecular biology (Clifton, N.J.)* **1084**, 193–226 (2014).
- 260 27. BI Costescu, F Gräter, Time-resolved force distribution analysis. *BMC biophysics* **6**, 5 (2013).
- 261 28. K Radovanac, et al., Stabilization of integrin-linked kinase by the hsp90-chip axis impacts cellular force generation, migration and  
262 the fibrotic response. *The EMBO journal* **32**, 1409–1424 (2013).
- 263 29. J Schindelin, et al., Fiji: an open-source platform for biological-image analysis. *Nat. methods* **9**, 676–682 (2012).
- 264 30. RJ Pelham, YI Wang, Cell locomotion and focal adhesions are regulated by substrate flexibility. *Proc. Natl. Acad. Sci. United States  
265 Am.* **94**, 13661–13665 (1997).
- 266 31. ME Berginski, SM Gomez, The focal adhesion analysis server: a web tool for analyzing focal adhesion dynamics. *F1000Research*  
267 **2**, 68 (2013).
- 268 32. M Dembo, YI Wang, Stresses at the cell-to-substrate interface during locomotion of fibroblasts. *Biophys. journal* **76**, 2307–2316  
269 (1999).
- 270 33. Q Tseng, et al., A new micropatterning method of soft substrates reveals that different tumorigenic signals can promote or reduce  
271 cell contraction levels. *Lab on a chip* **11**, 2231–2240 (2011).
- 272 34. JY Tinevez, et al., Trackmate: An open and extensible platform for single-particle tracking. *Methods (San Diego, Calif.)* **115**, 80–90  
273 (2017).
